# Supplementary material for: An ultrafast response grating structural ZnO photodetector with back-to-back Schottky barriers produced by hydrothermal growth
Source: Royal Society of Chemistry journal article supplement (doi:10.1039/c4tc02821j), 2015-01-01
Supplement: c4tc02821j1.pdf [file c4tc02821j1.pdf]

## Supporting Information

### Title

**“An Ultrafast Response Grating Structural ZnO Photodetector with Back-to-Back Schottky Barriers Produced by Hydrothermal Growth”**

**Cheolmin Park, Jihye Lee, Hye-Mi So, Won Seok Chang\***

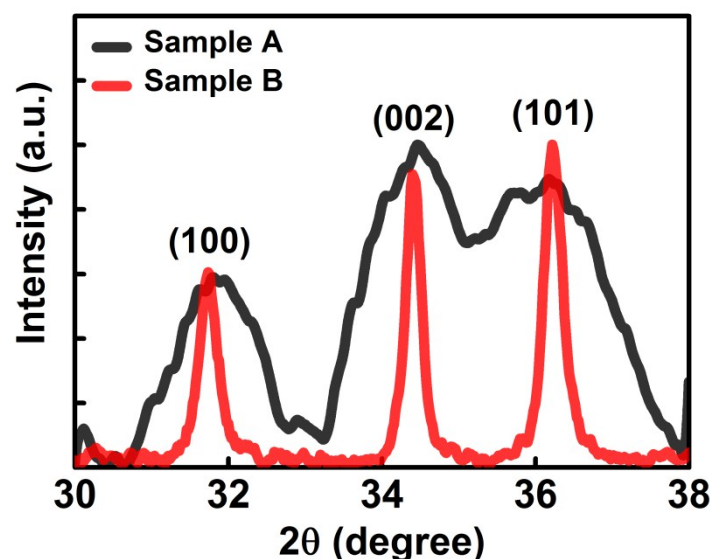

**Fig. S1** Normalized XRD data of sample A (3 min growth time) and sample B (20 min growth time). (100), (002), (101) reflections indicate the wurzite crystal structure. Due to low growth time of sample A, it has a mixed structure of polycrystalline and amorphous with smaller grain size than sample B.

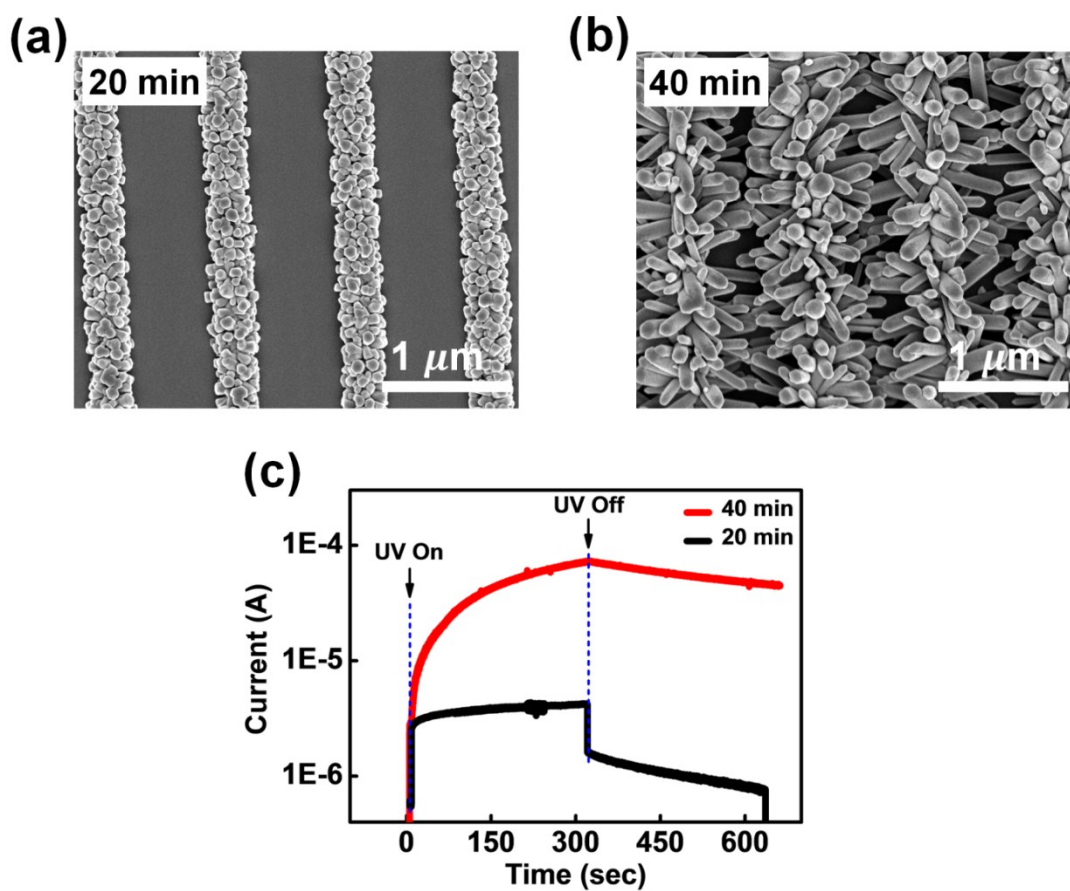

**Fig. S2** SEM images of growth times of 20 min (sample B) (a) and 40 min (b). (c) Long time UV on/off response for growth times of 20 min and 40 min. The sample with 40 min growth time shows higher photo-generated current than that with 20 min growth time, while it relatively has long response time.

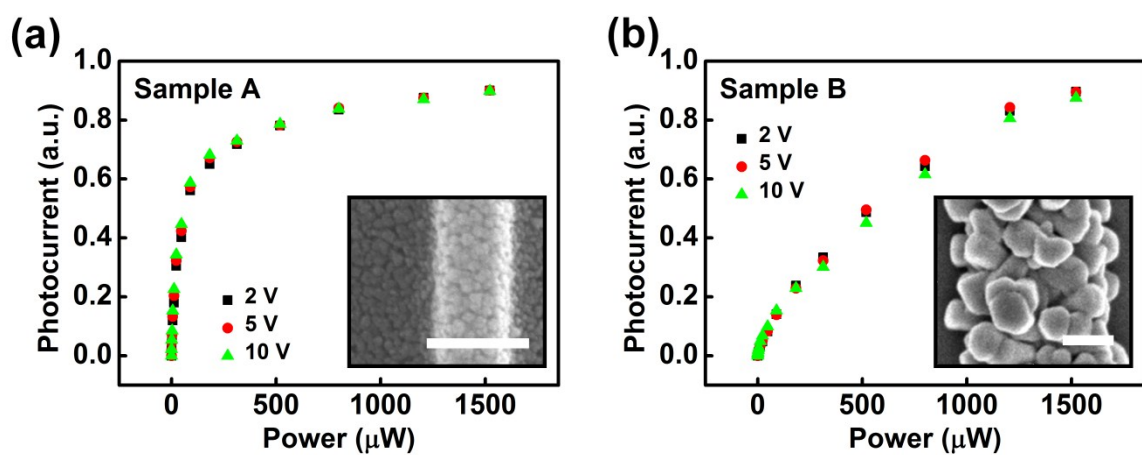

**Fig. S3** (a, b) Photocurrent of sample A and B at 2 V, 5 V, and 10 V bias voltages with various intensities of UV light. The insets are SEM images with 100 nm scale bar. Sample A has a sensitivity at low optical power until 185  $\mu\text{W}$ , while sample B has almost linear curve until 1.5 mW.
